# Supplementary material for: Prevalence and Factors Associated with Substance Use and Misuse among Kosovar Adolescents; Cross Sectional Study of Scholastic, Familial-, and Sports-Related Factors of Influence
Source: MDPI journal article supplement (doi:10.3390/ijerph13050502), 2016-05-16
Supplement: s1 [file s1]

# Supplementary Materials: Prevalence and Factors Associated with Substance Use and Misuse among Kosovar Adolescents; Cross Sectional Study of Scholastic, Familial-, and Sports-Related Factors of Influence

Enver Tahiraj, Mladen Cubela, Ljerka Ostojic, Jelena Rodek, Natasa Zenic, Damir Sekulic and Blaz Lesnik

**Table S1.** Descriptive data (frequencies—f, and percentages—%) for the studied scholastic-, sport, and familial-factors.

|                                                | <b>Total</b>     | <b>Boys</b>      | <b>Girls</b>     |
|------------------------------------------------|------------------|------------------|------------------|
|                                                | <b>(N = 980)</b> | <b>(N = 357)</b> | <b>(N = 623)</b> |
|                                                | <b>f (%)</b>     | <b>f (%)</b>     | <b>f (%)</b>     |
| <b>Grade Point Average</b>                     |                  |                  |                  |
| Excellent/very good                            | 780 (79.67)      | 269 (75.4)       | 511 (82.0)       |
| Average                                        | 174 (17.8)       | 82 (23)          | 92 (14.8)        |
| Under-average and failed                       | 26 (2.7)         | 6 (1.7)          | 20 (3.2)         |
| <b>Behavioral Grade</b>                        |                  |                  |                  |
| Excellent                                      | 762 (77.8)       | 254 (71.1)       | 508 (81.5)       |
| Average                                        | 192 (19.6)       | 95 (26.6)        | 97 (15.6)        |
| Poor                                           | 26 (2.7)         | 8 (2.2)          | 18 (2.9)         |
| <b>Time of the Involvement in Sport</b>        |                  |                  |                  |
| Never involved                                 | 292 (29.8)       | 50 (14)          | 242 (38.8)       |
| Less than a year                               | 294 (30)         | 84 (23.5)        | 210 (33.7)       |
| 1–5 years                                      | 235 (24)         | 119 (33.3)       | 116 (18.6)       |
| More than 5 years                              | 159 (16.2)       | 104 (29.2)       | 55 (8.8)         |
| <b>Sport Achievement</b>                       |                  |                  |                  |
| Never competed                                 | 738 (75.3)       | 205 (57.4)       | 533 (85.6)       |
| Competitions of the lower ranks                | 146 (14.9)       | 77 (21.6)        | 69 (11.1)        |
| National level competitions and higher         | 96 (9.8)         | 75 (21)          | 21 (3.4)         |
| <b>Socio Economic Status (Family Finances)</b> |                  |                  |                  |
| Under Average                                  | 16 (1.6)         | 8 (2.2)          | 8 (1.3)          |
| Average                                        | 809 (82.6)       | 291 (81.5)       | 518 (83.1)       |
| Above average                                  | 155 (15.8)       | 58 (16.2)        | 97 (15.6)        |
| <b>Paternal Education</b>                      |                  |                  |                  |
| Elementary school                              | 18 (1.8)         | 6 (1.7)          | 12 (1.9)         |
| High school                                    | 552 (56.3)       | 182 (50.9)       | 370 (59.4)       |
| College/University degree                      | 410 (41.8)       | 169 (47.3)       | 241 (38.7)       |
| <b>Maternal Education</b>                      |                  |                  |                  |
| Elementary school                              | 122 (12.4)       | 34 (9.5)         | 88 (14.1)        |
| High school                                    | 592 (60.4)       | 213 (59.7)       | 379 (60.9)       |
| College/University degree                      | 266 (27.1)       | 110 (30.8)       | 156 (25)         |

**Table S2.** Descriptive data (frequencies–f, and percentages-%) for cigarette smoking and consumption of other drugs, Differences between genders (Kruskal Wallis test H, level of significance–p).

|                                  | Total      | Males      | Females    | KW    |      |
|----------------------------------|------------|------------|------------|-------|------|
|                                  | (N = 980)  | (N = 357)  | (N = 623)  | H     | p    |
|                                  | f (%)      | f (%)      | f (%)      |       |      |
| Cigarette Smoking                |            |            |            | 18.14 | 0.01 |
| Never smoked                     | 605 (61.7) | 189 (52.9) | 416 (66.8) |       |      |
| Quit                             | 28 (2.9)   | 18 (5)     | 10 (1.6)   |       |      |
| From time to time. but not daily | 232 (23.7) | 93 (26.1)  | 139 (22.3) |       |      |
| Daily. less than 10 cigarettes   | 37 (3.8)   | 14 (3.9)   | 23 (3.7)   |       |      |
| A pack daily                     | 32 (3.3)   | 21 (5.9)   | 11 (1.8)   |       |      |
| More than a pack daily           | 46 (4.7)   | 22 (6.2)   | 24 (3.9)   |       |      |
| Ephedrine                        |            |            |            | 3.75  | 0.06 |
| Never                            | 961 (98.1) | 346 (96.9) | 615 (98.7) |       |      |
| Ever tried                       | 10 (1)     | 8 (2.2)    | 2 (0.3)    |       |      |
| Once or twice                    | 9 (0.9)    | 3 (0.8)    | 6 (1)      |       |      |
| Cocaine                          |            |            |            | 3.53  | 0.06 |
| Never                            | 969 (98.9) | 350 (98)   | 619 (99.4) |       |      |
| Ever tried                       | 6 (0.6)    | 4 (1.1)    | 2 (0.3)    |       |      |
| Once or twice                    | 5 (0.5)    | 3 (0.8)    | 2 (0.3)    |       |      |
| SPEED                            |            |            |            | 7.18  | 0.06 |
| Never                            | 969 (98.9) | 348 (97.5) | 621 (99.7) |       |      |
| Ever tried                       | 4 (0.4)    | 4 (1.1)    | 0 (0)      |       |      |
| Once or twice                    | 2 (0.2)    | 2 (0.6)    | 0 (0)      |       |      |
| 3–5 times                        | 3 (0.3)    | 3 (0.8)    | 0 (0)      |       |      |
| 6–9 times                        | 2 (0.2)    | 0 (0)      | 2 (0.3)    |       |      |
| Ecstasy                          |            |            |            | 3.53  | 0.06 |
| Never                            | 969 (98.9) | 350 (98)   | 619 (99.4) |       |      |
| Ever tried                       | 6 (0.6)    | 4 (1.1)    | 2 (0.3)    |       |      |
| Once or twice                    | 2 (0.2)    | 2 (0.6)    | 0 (0)      |       |      |
| 3–5 time                         | 1 (0.1)    | 1 (0.3)    | 0 (0)      |       |      |
| 6–9 times                        | 2 (0.2)    | 0 (0)      | 2 (0.3)    |       |      |
| Cannabis                         |            |            |            | 34.21 | 0.01 |
| Never                            | 918 (93.7) | 313 (87.7) | 605 (97.1) |       |      |
| Ever tried                       | 14 (1.4)   | 6 (1.7)    | 8 (1.3)    |       |      |
| Once or twice                    | 12 (1.2)   | 12 (3.4)   | 0 (0)      |       |      |
| 3–5 times                        | 10 (1)     | 8 (2.2)    | 2 (0.3)    |       |      |
| 6–9 times                        | 9 (0.9)    | 7 (2)      | 2 (0.3)    |       |      |
| 10 times and more                | 17 (1.7)   | 11 (3)     | 6 (1)      |       |      |
| Hashish                          |            |            |            | 19.14 | 0.01 |
| Never                            | 949 (96.8) | 334 (93.6) | 615 (98.7) |       |      |
| Ever tried                       | 10 (1)     | 8 (2.2)    | 2 (0.3)    |       |      |
| Once or twice                    | 4 (0.4)    | 4 (1.1)    | 0 (0)      |       |      |
| 6–9 times                        | 5 (0.5)    | 5 (1.4)    | 0 (0)      |       |      |
| 10 times and more                | 12 (1.2)   | 6 (1.7)    | 6 (0.9)    |       |      |
| LSD                              |            |            |            | 1.68  | 0.19 |
| Never                            | 967 (98.7) | 350 (98)   | 617 (99)   |       |      |
| Ever tried                       | 9 (0.9)    | 7 (2)      | 2 (0.3)    |       |      |
| 3–5 times                        | 2 (0.2)    | 0 (0)      | 2 (0.3)    |       |      |
| 10 times and more                | 2 (0.2)    | 0 (0)      | 2 (0.3)    |       |      |
| Heroin                           |            |            |            | 3.73  | 0.06 |
| Never                            | 973 (99.3) | 352 (98.6) | 621 (99.7) |       |      |
| Ever tried                       | 5 (0.5)    | 3 (0.8)    | 2 (0.3)    |       |      |
| 10 times and more                | 2 (0.2)    | 2 (0.6)    | 0 (0)      |       |      |
| Ketamine                         |            |            |            | 3.68  | 0.09 |
| Never                            | 971 (99.1) | 350 (98)   | 621 (99.7) |       |      |
| Ever tried                       | 4 (0.4)    | 4 (1.1)    | 0 (0)      |       |      |
| Once or twice                    | 3 (0.3)    | 1 (0.3)    | 2 (0.3)    |       |      |
| 10 times and more                | 2 (0.2)    | 2 (0.6)    | 0 (0)      |       |      |

Table S2. Cont.

|                   | Total      | Males      | Females    | KW   |      |
|-------------------|------------|------------|------------|------|------|
|                   | (N = 980)  | (N = 357)  | (N = 623)  |      |      |
|                   | f (%)      | f (%)      | f (%)      | H    | p    |
| GHB               |            |            |            | 1.14 | 0.23 |
| Never             | 971 (99.1) | 352 (98.6) | 619 (99.4) |      |      |
| Ever tried        | 4 (0.4)    | 2 (0.6)    | 2 (0.3)    |      |      |
| Once or twice     | 4 (0.4)    | 2 (0.6)    | 2 (0.3)    |      |      |
| 10 times and more | 1 (0.1)    | 1 (0.3)    | 0 (0)      |      |      |
| Sedatives         |            |            |            | 8.37 | 0.04 |
| Never             | 886 (90.4) | 336 (94.1) | 550 (88.3) |      |      |
| Ever tried        | 63 (6.4)   | 11 (3.1)   | 52 (8.3)   |      |      |
| Once or twice     | 16 (1.6)   | 2 (0.6)    | 14 (2.2)   |      |      |
| 3–5 times         | 7 (0.7)    | 4 (1.1)    | 3 (0.5)    |      |      |
| 6–9 times         | 2 (0.2)    | 2 (0.6)    | 0 (0)      |      |      |
| 10 times and more | 6 (0.6)    | 2 (0.6)    | 4 (0.6)    |      |      |
| Inhalants         |            |            |            | 0.12 | 0.73 |
| Never             | 920 (93.9) | 334 (93.6) | 586 (94.1) |      |      |
| Ever tried        | 34 (3.5)   | 12 (3.4)   | 22 (3.5)   |      |      |
| Once or twice     | 8 (0.8)    | 2 (0.6)    | 6 (1)      |      |      |
| 3–5 times         | 2 (0.2)    | 2 (0.6)    | 0 (0)      |      |      |
| 6–9 times         | 2 (0.2)    | 0 (0)      | 2 (0.3)    |      |      |
| 10 times and more | 14 (1.4)   | 7 (2)      | 7 (1.1)    |      |      |

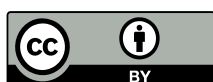

© 2016 by the authors; licensee MDPI, Basel, Switzerland. This article is an open access article distributed under the terms and conditions of the Creative Commons Attribution (CC-BY) license (<http://creativecommons.org/licenses/by/4.0/>).
